# Supplementary material for: Solvent-free direct reductive amination by catalytic use of an organotin reagent incorporated on an ionic liquid
Source: Royal Society of Chemistry journal article supplement (doi:10.1039/b912697j), 2009-01-01
Supplement: b912697j.pdf [file b912697j.pdf]

## Supporting Information

### **Title: Solvent-Free One-Pot Reductive Amination by catalytic use of tin reagent incorporated on ionic liquid**

**Phuoc Dien Pham,<sup>a</sup> Philippe Bertus<sup>a</sup> and Stéphanie Legoupy<sup>a\*</sup>**

<sup>a</sup> *Laboratoire de Synthèse Organique, UCO2M, UMR CNRS 6011, Université du Maine, Avenue Olivier Messiaen, 72085 Le Mans Cedex 9, France*

*\*E-mail: stephanie.legoupy@univ-lemans.fr*

*Tel: +33 2 43 83 30 9; Fax: +33 2 43 83 39 02*

## Experimental

### I. General

All moisture-sensitive reactions were carried out in oven-dried glassware (100°C) under N<sub>2</sub>. Commercially available reagents and solvents were purified and dried, when necessary, by standard methods prior to use. IR spectra were scanned on a Nicolet Avatar 370 DTGS FTIR spectrophotometer. <sup>1</sup>H NMR spectra were recorded on a Bruker Avance 400 (400 MHz) spectrometers. Chemical shifts are reported in ppm. TMS was used as the internal standard for CDCl<sub>3</sub>. <sup>13</sup>C NMR spectra were recorded on a Bruker Avance 400 (100 MHz) with complete proton decoupling. High resolution mass spectra measurements were recorded on Waters-Micromass GCT Premier spectrometers. Analytical thin layer chromatography was performed on pre-coated silica gel 60-F<sub>254</sub> plates. For preparative chromatography silica gel 60 (230-400 mesh) was used. Reagents were purchased from commercial suppliers and were used without purification unless otherwise noted.

### II. Representative Procedure for the Reductive Amination of Benzaldehyde with Aniline

To a solution of benzaldehyde (0.362 mL, 3.56 mmol, 1.0 equiv) were added at room temperature, aniline (0.325 mL, 3.56 mmol, 1.0 equiv) and 1-((dibutylchlorostannyl)hexyl)-3-methyl-1*H*-imidazol-3-ium iodide (**1**) (2 mg, 3.56x10<sup>-3</sup> mmol, 0.001 equiv). The resulting yellow solution was allowed to stir for 10 min, and treated with phenylsilane (0.482 mL, 3.92 mmol, 1.1 equiv). After 2 h, thin layer chromatography showed no remaining aniline. The colorless reaction was evaporated by rotavaporation in order to remove maximum of phenylsilane and the mixture was distilled by short path distillation (90°C, 3x10<sup>-2</sup> mbar) to afford the product (84% yield).

***N*-Benzylaniline (4a)<sup>1</sup>**

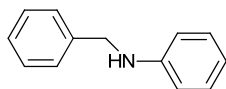

<sup>1</sup>H NMR (CDCl<sub>3</sub>, 400 MHz) δ 3.99 (br s, 1H, NH), 4.31 (s, 2H), 6.61-6.63 (m, 2H), 6.69-6.73 (m, 1H), 7.14-7.37 (m, 7H); <sup>13</sup>C NMR (CDCl<sub>3</sub>, 100 MHz) δ 48.4, 112.9, 117.6, 127.3, 127.6, 128.7, 129.4, 139.5, 148.2

***N*-(4-Nitrobenzyl)benzenamine (4b)<sup>2,3,4</sup>**

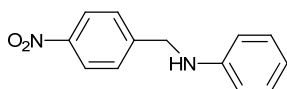

<sup>1</sup>H NMR (CDCl<sub>3</sub>, 400 MHz) δ 4.25 (br s, 1H, NH), 4.46 (s, 3H), 6.56-6.58 (m, 2H), 6.72-6.76 (m, 1H), 7.14-7.18 (m, 2H), 7.51-7.53 (m, 2H), 8.16-8.19 (m, 2H); <sup>13</sup>C NMR (CDCl<sub>3</sub>, 100 MHz) δ 47.7, 112.9, 118.3, 123.9, 127.7, 129.4, 147.2, 147.3, 147.8.

***N*-(4-Methoxybenzyl)benzenamine (4c)<sup>2</sup>**

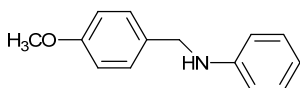

<sup>1</sup>H NMR (CDCl<sub>3</sub>, 400 MHz) δ 3.79 (s, 3H), 3.95 (br s, 1H, NH), 4.24 (s, 2H), 6.59-6.74 (m, 3H), 6.83-6.91 (m, 2H), 7.13-7.32 (m, 4H); <sup>13</sup>C NMR (CDCl<sub>3</sub>, 100 MHz) δ 47.8, 55.4, 112.9, 114.1, 117.6, 128.9, 129.3, 131.5, 148.3, 158.9.

***N*-Benzyl-2-*tert*-butylaniline (4d)<sup>5</sup>**

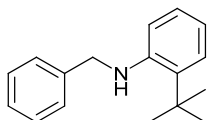

<sup>1</sup>H NMR (CDCl<sub>3</sub>, 400 MHz) δ 1.43 (s, 9H), 4.40 (s, 2H), 6.65-6.73 (m, 2H), 7.08-7.23 (m, 1H), 7.25-7.41 (m, 6H); <sup>13</sup>C NMR (CDCl<sub>3</sub>, 100 MHz) δ 29.9, 34.2, 48.9, 111.9, 117.2, 126.2, 127.2, 127.5, 128.7, 133.2, 139.6, 146.1.

**2-*tert*-Butyl-*N*-octylbenzenamine (4e)**

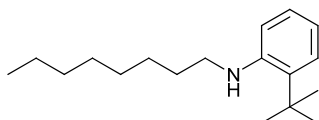

<sup>1</sup>H NMR (CDCl<sub>3</sub>, 400 MHz) δ 1.43 (s, 9H), 4.40 (s, 2H), 6.65-6.73 (m, 2H), 7.08-7.12 (m, 1H), 7.25-7.41 (m, 6H); <sup>13</sup>C NMR (CDCl<sub>3</sub>, 100 MHz) δ 14.1, 22.7, 24.8, 27.5, 29.3, 29.4, 29.6, 29.9, 31.9, 44.4, 111.6, 116.6, 126.1, 127.2, 132.9, 146.7; HRMS calcd. for C<sub>18</sub>H<sub>31</sub>N 261.2457. Found 261.2473 (6.1 ppm).

***N*-(Cyclopentylmethyl)benzenamine (4f)<sup>6</sup>**

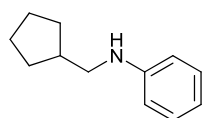

$^1\text{H NMR}$  ( $\text{CDCl}_3$ , 400 MHz)  $\delta$  0.92-1.82 (m, 9H), 3.52-3.60 (d,  $J=6.7$  Hz, 2H), 6.56-6.58 (m, 2H), 6.63-6.68 (m, 1H), 7.13-7.17 (m, 2H);  $^{13}\text{C NMR}$  ( $\text{CDCl}_3$ , 100 MHz)  $\delta$  26.1, 26.7, 31.4, 37.7, 50.7, 112.7, 116.9, 129.3, 148.7.

**Dibenzylamine (4g)**<sup>7</sup>

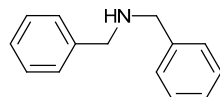

$^1\text{H NMR}$  ( $\text{CDCl}_3$ , 400 MHz)  $\delta$  1.71 (br s, 1H), 3.80 (s, 4H), 7.21-7.34 (m, 10H);  $^{13}\text{C NMR}$  ( $\text{CDCl}_3$ , 100 MHz)  $\delta$  53.2, 127.1, 128.3, 128.5, 140.4.

**N-(Furan-2-ylmethyl)benzenamine (4h)**<sup>1</sup>

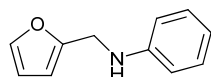

$^1\text{H NMR}$  ( $\text{CDCl}_3$ , 400 MHz)  $\delta$  4.00 (br s, 1H), 4.31 (s, 2H), 6.22-6.23 (m, 1H), 6.31-6.32 (m, 1H), 6.66-6.68 (m, 2H), 6.72-6.76 (m, 1H), 7.16-7.21 (m, 2H), 7.35-7.36 (m, 1H);  $^{13}\text{C NMR}$  ( $\text{CDCl}_3$ , 100 MHz)  $\delta$  41.5, 107.1, 110.5, 113.3, 118.1, 129.4, 142.0, 147.8, 152.9.

**N-Cinnamylaniline (4i)**<sup>1,4</sup>

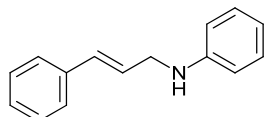

$^1\text{H NMR}$  ( $\text{CDCl}_3$ , 400 MHz) 3.85 (br s, 1H), 3.94 (d,  $J=5.6$  Hz, 2H), 6.34 (dt,  $J=5.8$ ,  $J=15.9$  Hz, 1H), 6.61-6.69 (m, 3H), 6.70-6.75 (m, 1H), 7.17-7.38 (m, 7H);  $^{13}\text{C NMR}$  ( $\text{CDCl}_3$ , 100 MHz) 46.3, 113.1, 117.7, 126.4, 127.1, 127.6, 128.6, 129.3, 131.6, 136.9, 148.1.

**4-Benzylmorpholine (5a)**<sup>7</sup>

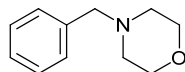

$^1\text{H NMR}$  ( $\text{CDCl}_3$ , 400 MHz)  $\delta$  2.43-2.45 (m, 4H), 3.50 (s, 2H), 3.69-3.72 (m, 4H), 7.23-7.34 (m, 5H);  $^{13}\text{C NMR}$  ( $\text{CDCl}_3$ , 100 MHz)  $\delta$  53.6, 63.5, 67.0, 127.2, 128.3, 129.2, 137.8.

**1-Benzylpiperidine (5b)**<sup>7</sup>

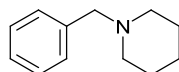

$^1\text{H NMR}$  ( $\text{CDCl}_3$ , 400 MHz)  $\delta$  1.54-1.59 (m, 2H), 2.37 (br s, 4H), 3.43-3.47 (m, 4H), 7.20-7.33 (m, 5H);  $^{13}\text{C NMR}$  ( $\text{CDCl}_3$ , 100 MHz)  $\delta$  24.4, 26.0, 26.2, 54.5, 63.9, 126.8, 128.1, 129.3, 138.7.

**N-Benzyl-N-methylaniline (5c)**<sup>7</sup>

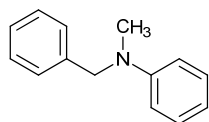

**<sup>1</sup>H NMR** (CDCl<sub>3</sub>, 400 MHz) δ 2.99 (s, 3H), 4.51 (s, 2H), 6.68-6.75 (m, 3H), 7.19-7.32 (m, 7H); **<sup>13</sup>C NMR** (CDCl<sub>3</sub>, 100 MHz) δ 41.8, 58.1, 114.2, 121.8, 127.1, 127.9, 128.4, 129.7, 133.2; 138.9.

#### Tribenzylamine (5d)<sup>7</sup>

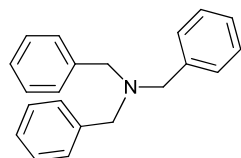

**<sup>1</sup>H NMR** (CDCl<sub>3</sub>, 400 MHz) δ 3.88 (s, 6H), 7.30-7.48 (m, 15H); **<sup>13</sup>C NMR** (CDCl<sub>3</sub>, 100 MHz) δ 53.0, 127.1, 128.3, 128.5, 139.9.

#### 4-Cyclohexylmorpholine (7a)<sup>7</sup>

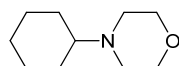

**<sup>1</sup>H NMR** (CDCl<sub>3</sub>, 400 MHz) δ 1.09-1.94 (m, 10H), 2.18-2.25 (m, 1H), 2.58-2.61 (m, 4H), 3.75-3.77 (m, 4H); **<sup>13</sup>C NMR** (CDCl<sub>3</sub>, 100 MHz) δ 25.8, 26.3, 28.9, 49.7, 63.8, 67.5.

#### 1-Cyclohexyl-4-phenylpiperazine (7b)<sup>8</sup>

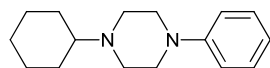

**<sup>1</sup>H NMR** (CDCl<sub>3</sub>, 400 MHz) δ 1.09-1.93 (m, 10H), 2.26-2.33 (m, 1H), 2.72-2.74 (m, 4H), 3.19-3.21 (m, 4H), 6.82-6.87 (m, 1H), 6.92-6.94 (m, 2H), 7.23-7.28 (m, 3H); **<sup>13</sup>C NMR** (CDCl<sub>3</sub>, 100 MHz) δ 25.9, 26.4, 29.0, 49.1, 49.7, 63.6, 116.1, 119.6, 129.1, 151.5.

#### N-Cyclohexylaniline (7c)<sup>7</sup>

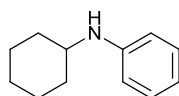

**<sup>1</sup>H NMR** (CDCl<sub>3</sub>, 400 MHz) δ 1.07-1.39 (m, 5H), 1.60-1.66 (m, 1H), 1.71-1.76 (m, 2H), 2.02-2.05 (m, 2H), 3.19-3.26 (m, 1H), 3.46 (s, 1H), 6.55-6.57 (m, 2H), 6.62-6.67 (m, 1H), 7.12-7.16 (m, 2H); **<sup>13</sup>C NMR** (CDCl<sub>3</sub>, 100 MHz) δ 25.2, 26.1, 35.6, 51.8, 113.5, 116.9, 129.8, 147.5.

#### N-Cyclohexyl-N-methylbenzenamine (7d)<sup>9</sup>

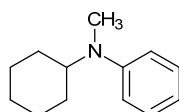

$^1\text{H NMR}$  ( $\text{CDCl}_3$ , 400 MHz)  $\delta$  1.08-1.85 (m, 10H), 2.76 (s, 3H), 3.52-3.60 (m, 1H), 6.65-6.69 (m, 1H), 6.76-6.78 (m, 2H), 7.18-7.24 (m, 2H);  $^{13}\text{C NMR}$  ( $\text{CDCl}_3$ , 100 MHz)  $\delta$  26.1, 26.3, 30.1, 30.2, 58.2, 113.3, 116.3, 129.2, 150.3.

### III. Synthesis of tin reagent supported on ionic liquid (**1**)

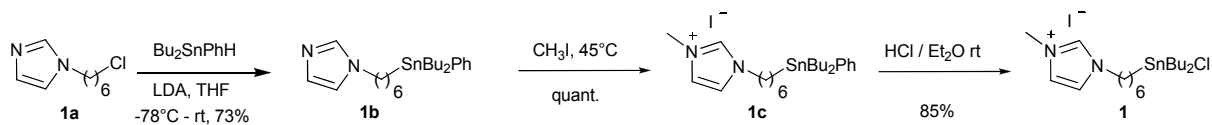

#### 1-{6-[Dibutyl(phenyl)stannyl]hexyl}-1H-imidazole (**1b**)<sup>10</sup>

To a solution of lithium diisopropylamide (11.3 mmol) in dry THF (40 mL), dibutylphenyltin hydride (3.45 g, 11.1 mmol) was slowly added at  $-78^\circ\text{C}$ . The resulting mixture was stirred for 1 h at  $-50^\circ\text{C}$  and subsequently added to a solution of 1-(6-chlorohexyl)-1H-imidazole (1.57 g, 8.5 mmol) in dry THF (20 mL) at  $-50^\circ\text{C}$ . Then the mixture was allowed to warm up to r.t. and stirred for 18 h. Water (5 mL) was slowly added and the mixture was stirred for additional 15 min at r.t.. To this mixture  $\text{CH}_2\text{Cl}_2$  (100 mL) was added and the organic phase was successively washed with  $\text{H}_2\text{O}$  (20 mL) and brine (10 mL). The aqueous layer was extracted with  $\text{CH}_2\text{Cl}_2$  ( $3 \times 20$  mL), and the organic combined phase was dried over  $\text{MgSO}_4$ , filtered, and concentrated under reduced pressure. The resulting crude product (4.69 g) was then purified by column chromatography (silica gel with solvent:  $\text{AcOEt}:\text{Cyclohexane}$  (80:20) to yield the pure product **1b** as a colorless oil (2.86 g, 6.2 mmol, 73%).  $^1\text{H NMR}$  ( $\text{CDCl}_3$ , 400 MHz):  $\delta$  0.88 (t,  $J=7.2$  Hz, 6H), 0.89–1.07 (m, 5H), 1.27–1.37 (m, 8H), 1.50–1.57 (m, 5H), 1.64 (br s, 2H), 1.68–1.75 (m, 2H), 3.87 (t,  $J=7.2$  Hz, 2H), 6.87 (s, 1H), 7.05 (s, 1H), 7.29–7.45 (m, 6H);  $^{13}\text{C NMR}$  ( $\text{CDCl}_3$ , 100 MHz):  $\delta$  9.5, 9.6, 13.7, 26.0, 26.6, 27.4, 29.1, 31.0, 33.7, 47.0, 118.8, 128.0, 128.1, 129.3, 136.5, 137.1, 141.8;  $^{119}\text{Sn NMR}$  (149 MHz,  $\text{CDCl}_3$ ):  $\delta$   $-43.9$ ; **IR** (neat): 446, 503, 596, 662, 698, 725, 808, 1074, 1228, 1282, 1427, 1462, 1504, 2850, 2922, 2955  $\text{cm}^{-1}$ ; **HRMS** calcd. for  $\text{C}_{23}\text{H}_{39}\text{N}_2^{120}\text{Sn}$  463.2135. Found 463.2138.

#### 1-{6-[Dibutyl(phenyl)stannyl]hexyl}-3-methyl-1H-imidazolium iodide (**1c**)<sup>10</sup>

In a dried sealed tube, crude 1-{3-[dibutyl(phenyl)stannyl]hexyl}-1H-imidazole (**1b**) (1.02 g, 2.2 mmol) was dissolved in methyl iodide (0.5 mL) and stirred over night at  $40^\circ\text{C}$ . The mixture was cooled down to r.t. and the excess methyl iodide was evaporated under reduced pressure to yield **1c** (1.33 g, 2.2 mmol, 99%) as a pale yellow oil.  $^1\text{H NMR}$  ( $\text{CDCl}_3$ , 400 MHz):  $\delta$  0.88 (t,  $J=7.2$  Hz, 6H), 0.98–1.57 (m, 20H), 1.83–1.90 (m, 2H), 4.11 (s, 3H), 4.25 (t,  $J=7.5$  Hz, 2H), 7.20 (s, 1H), 7.29–7.46 (m, 6H), 10.17 (s, 1H);  $^{13}\text{C NMR}$  ( $\text{CDCl}_3$ , 100 MHz):  $\delta$  9.4, 9.5, 13.6, 25.6, 26.5, 27.3, 29.0, 30.1, 33.5, 37.1, 50.1, 121.8, 123.6, 128.0, 136.4, 136.8, 136.8, 141.7;  $^{119}\text{Sn NMR}$  (149 MHz,  $\text{CDCl}_3$ ):  $\delta$   $-43.8$ ; **IR** (neat): 447, 505, 617, 656, 700, 727, 862, 1072, 1165, 1375, 1427, 1462, 1568, 2848, 2922, 2953, 3061  $\text{cm}^{-1}$ ; **HRMS** calcd. for  $\text{C}_{24}\text{H}_{41}\text{N}_2^{120}\text{Sn}$  477.2291. Found 477.2296.

**1-{6-[Dibutyl(chloro)stannyl]hexyl}-3-methyl-1*H*-imidazolium iodide (1)<sup>11</sup>**

To a solution of **1c** (1.25 g, 2.07 mmol) in CH<sub>2</sub>Cl<sub>2</sub> (10 mL) was added dropwise at 0–5 °C over a period of 5 min, a solution of HCl 2M in ether (1.1 mL, 2.2 mmol). The mixture was stirred for 2 h at rt, then treated with H<sub>2</sub>O (10 mL). To this mixture CH<sub>2</sub>Cl<sub>2</sub> (20 mL) was added and the organic phase was washed with H<sub>2</sub>O (3x20 mL), and the aqueous phase was washed CH<sub>2</sub>Cl<sub>2</sub> (3x10 mL), the combined organic phase was then dried over MgSO<sub>4</sub>, filtered, and concentrated under reduced pressure to yield **1** (988 mg, 85%) as a yellow viscous oil. <sup>1</sup>H NMR (CDCl<sub>3</sub>, 400 MHz): δ 0.92 (t, *J*=7.3 Hz, 6H), 1.31–1.99 (m, 22 H), 4.12 (s, 3H), 4.34 (t, *J*=7.3 Hz, 2H), 7.42–7.40 (m, 2H), 10.10 (s, 1H); <sup>13</sup>C NMR (CDCl<sub>3</sub>, 100 MHz): δ 13.7, 18.1, 18.5, 25.4, 25.9, 26.8, 28.6, 29.9, 32.6, 37.1, 50.2, 123.4, 123.7, 136.6; <sup>119</sup>Sn NMR (149 MHz, CDCl<sub>3</sub>): δ +105.7; IR (neat): 519, 678, 1166, 1462, 1579, 2853, 2920, 2953, 3082 cm<sup>-1</sup>; HRMS calcd. for C<sub>18</sub>H<sub>36</sub>N<sub>2</sub>Cl<sup>120</sup>Sn 435.1589. Found 435.1595.

<sup>1</sup> T. Kawakami, T. Sugimoto, I. Shibata, A. Baba, H. Matsuda and N. Sonoda, *J. Org. Chem.*, 1995, **60**, 2677–2682.

<sup>2</sup> T. Suwa, E. Sugiyama, I. Shibata and A. Baba, *Synthesis*, 2000, 789–800.

<sup>3</sup> B. T. Cho and S. K. Kang, *Synlett*, 2004, **9**, 1484–1488.

<sup>4</sup> R. Apodaca and W. Xiao, *Org. Lett.*, 2001, **3**, 1745–1748.

<sup>5</sup> J. M. Janusz, P. A. Young, M. W. Scherz, K. Enzweiler, L. I. Wu, L. Gan, S. Pikul, K. L. McDow-Dunham, C. R. Johnson, C. B. Senanayake, D. E. Kellstein, S. A. Green, J. L. Tulich, T. Rosario-Jansen, I. J. Magrisso, K. R. Wehmeyer, D. L. Kuhlenbeck, T. H. Eichhold and Roy L. M. Dobson, *J. Med. Chem.*, 1998, **41**, 1124–1137.

<sup>6</sup> Byun, Eunyong; Hong, Bomi; De Castro, Kathlia A.; Lim, Minkyung; Rhee, Hakjune, *J. Org. Chem.*, 2007, **72**, 9815–9817.

<sup>7</sup> <sup>1</sup>H NMR and <sup>13</sup>C NMR of **4g** (CAS [103-49-1]), **5a** (CAS [92-53-5]), **5b** (CAS [4096-20-2]), **5c** (CAS [614-30-2]), **5d** (CAS [620-40-6]), **7a** (CAS [6425-41-8]), **7c** (CAS [1821-36-9]) and the commercially available products were identical.

<sup>8</sup> R. N. Hanson, M. Hassan, *J. Med. Chem.*, 1987, **30**, 29–34.

<sup>9</sup> O.-Y. Lee, K.-L. Law, C.-Y. Ho, D. Yang, *J. Org. Chem.*, 2008, **73**, 8829–8837.

<sup>10</sup> P. D. Pham, J. Vitz, C. Chamignon, A. Martel and S. Legoupy, *Eur. J. Org. Chem.*, 2009, 3249–3257.

<sup>11</sup> P. D. Pham and S. Legoupy, *Tetrahedron Lett.*, 2009, **50**, 3780–3782.
